# Supplementary material for: Isca, v1.0: a framework for the global modelling of the atmospheres of Earth and other planets at varying levels of complexity
Source: Copernicus journal article supplement (doi:10.5194/gmd-11-843-2018), 2018-03-06
Supplement: Supplementary file 1 [file gmd-11-843-2018-supplement.zip]

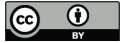

## *Supplement of*

# **Isca, v1.0: a framework for the global modelling of the atmospheres of Earth and other planets at varying levels of complexity**

**Geoffrey K. Vallis et al.**

*Correspondence to:* Geoffrey K. Vallis ([g.vallis@exeter.ac.uk](mailto:g.vallis@exeter.ac.uk))

- [gmd-11-843-2018-supplement-title-page.pdf](#)
- Isca-1.0
  - .gitignore
  - FieldNames.md
  - Jenkinsfile.in\_prep
  - LICENSE
  - Moist\_model\_code\_structure\_FMS2013.xlsx
  - PhysOptions.md
  - ReadMe.md
  - ReadMe.orig
  - bin
    - \* list\_paths
    - \* mkmf
    - \* mkmf.html
    - \* mkmf.template.gaea.intel
    - \* mkmf.template.gaea.intel.debug
    - \* mkmf.template.gfdl\_ws\_64.intel
    - \* mkmf.template.gfdl\_ws\_64.intel.without\_mpi
    - \* mkmf.template.ia64
    - \* mkmf.template.nyu
    - \* time\_stamp.csh
  - doc
    - \* .directory
    - \* diag\_table.html
    - \* field\_manager.html
    - \* mkmf.html

- \* quickstart.html
- \* quickstart.txt
- \* spectral\_core.pdf
- exp
  - \* debug
  - \* run\_isca
  - \* test\_cases
- input
  - \* land\_masks
  - \* rrtm\_input\_files
- postprocessing
  - \* compile\_mppn.sh
  - \* mppnccombine.c
  - \* mppnccombine\_run.sh
  - \* plevel\_interpolation
- src
  - \* .FMS.exe.cppdefs
  - \* .fms\_moist.x.cppdefs
  - \* atmos\_param
  - \* atmos\_shared
  - \* atmos\_solo
  - \* atmos\_spectral
  - \* coupler
  - \* extra
  - \* path\_names
  - \* shared
- test
  - \* test\_compile.py

The copyright of individual parts of the supplement might differ from the CC BY 4.0 License.
